# Supplementary material for: Differential Expression of Mitosis and Cell Cycle Regulatory Genes during Recovery from an Acute Respiratory Virus Infection
Source: MDPI journal article supplement (doi:10.3390/pathogens10121625), 2021-12-15
Supplement: s1 [file s1]

Supplementary Materials:

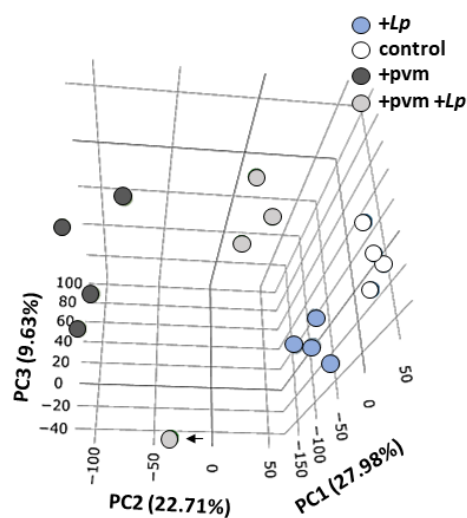

**Figure S1. Principal Component Analysis (PCA).** RNA was prepared from total lung tissues ( $n = 4$  mice) on day 14 after inoculation with sublethal PVM alone (day 0), sublethal PVM (day 0) followed by *Lp* (days 1 and 2), *Lp* alone (days 1 and 2) or diluent controls at all three time points (see Fig. 1a). At the arrow, data from one mouse deviated substantially from others in the PVM + *Lp* group. This sample was omitted from further evaluation.

**Table S1. Differential expression of inflammation-associated genes.** Ensembl identification, gene name, and log<sub>2</sub> fold change (FC) documenting differential regulation of proinflammatory genes from mouse lung tissue as revealed by RNA sequencing data. See also Figure 2a and GSE186740; transcripts marked with an asterisk (\*) are included in Figure 2b.

|    | ENSEMBL ID         | Gene name | Gene function                 | Log <sub>2</sub>  FC <br>+pvm vs. con-<br>trol | Log <sub>2</sub>  FC <br>+pvm+Lp vs. con-<br>trol | Log <sub>2</sub>  FC <br>+Lp vs. control |
|----|--------------------|-----------|-------------------------------|------------------------------------------------|---------------------------------------------------|------------------------------------------|
| 1  | ENSMUSG00000037872 | Ackr1     | chemokine receptor            | 2.38608675                                     | 1.847368221                                       | 1.133091624                              |
| 2  | ENSMUSG00000022126 | Acod1     | inhibits inflammation         | 3.837246566                                    | 2.942333613                                       | 0.705490783                              |
| 3  | ENSMUSG00000028989 | Angptl7   | extracell matrix              | 2.605452368                                    | 0.500259459                                       | 0.40221042                               |
| 4  | ENSMUSG00000027483 | Bpifa1*   | antimicrobial                 | 1.822354899                                    | 9.386988359                                       | 9.297699905                              |
| 5  | ENSMUSG00000027485 | Bpifb1*   | antimicrobial                 | 0.860499765                                    | 4.674932218                                       | 3.500421434                              |
| 6  | ENSMUSG00000036887 | C1qa      | complement component          | 2.07811307                                     | 1.165540391                                       | 0.445583867                              |
| 7  | ENSMUSG00000036905 | C1qb      | complement component          | 2.234702123                                    | 1.199378489                                       | 0.43188276                               |
| 8  | ENSMUSG00000036896 | C1qc      | complement component          | 2.106360772                                    | 0.928433573                                       | 0.303162027                              |
| 9  | ENSMUSG00000035352 | Ccl12     | chemokine                     | 2.150156111                                    | 1.437441118                                       | 0.861223811                              |
| 10 | ENSMUSG00000035385 | Ccl2      | chemokine                     | 3.862375765                                    | 0.938916051                                       | 0.167665719                              |
| 11 | ENSMUSG00000026166 | Ccl20     | chemokine                     | 3.378052137                                    | 3.168332839                                       | 1.643437337                              |
| 12 | ENSMUSG00000000982 | Ccl3      | chemokine                     | 2.100903371                                    | 1.345741939                                       | 0.452897851                              |
| 13 | ENSMUSG00000018930 | Ccl4      | chemokine                     | 2.966180339                                    | 1.858863182                                       | 0.316504949                              |
| 14 | ENSMUSG00000035373 | Ccl7      | chemokine                     | 4.312622121                                    | 1.789014137                                       | 0.689287496                              |
| 15 | ENSMUSG00000009185 | Ccl8      | chemokine                     | 5.087748851                                    | 2.81252292                                        | 1.014036017                              |
| 16 | ENSMUSG00000079227 | Ccr5      | chemokine receptor            | 2.602833603                                    | 1.374657343                                       | 0.012210853                              |
| 17 | ENSMUSG00000029380 | Cxcl1     | chemokine                     | 2.23371154                                     | 1.424025793                                       | -0.16747056                              |
| 18 | ENSMUSG00000034855 | Cxcl10    | chemokine                     | 3.523902128                                    | 1.342059734                                       | 0.186105864                              |
| 19 | ENSMUSG00000060183 | Cxcl11    | chemokine                     | 4.332361042                                    | 2.326578921                                       | -1.872586644                             |
| 20 | ENSMUSG00000029379 | Cxcl3     | chemokine                     | 2.93264748                                     | 1.959531072                                       | 0.309764119                              |
| 21 | ENSMUSG00000029417 | Cxcl9     | chemokine                     | 5.515614808                                    | 3.442068107                                       | 0.681681244                              |
| 22 | ENSMUSG00000050232 | Cxcr3     | chemokine receptor            | 2.818190623                                    | 2.090828009                                       | 0.355501475                              |
| 23 | ENSMUSG00000048521 | Cxcr6     | chemokine receptor            | 2.773620263                                    | 2.211408073                                       | 0.981142859                              |
| 24 | ENSMUSG00000037474 | Dtl       | ubiquitination                | 2.455550787                                    | 0.296804983                                       | -1.34702638                              |
| 25 | ENSMUSG00000029675 | Eln       | elastin                       | 1.957561099                                    | 0.23658655                                        | 0.481993897                              |
| 26 | ENSMUSG00000051279 | Gdf6      | cytokine TGF-beta family      | 3.423251645                                    | 0.088292786                                       | 1.589147033                              |
| 27 | ENSMUSG00000074934 | Grem1     | inhibitor TGF-beta signaling  | 3.051076599                                    | -0.094685338                                      | -0.307934632                             |
| 28 | ENSMUSG00000015437 | Gzmb      | granzyme b                    | 2.599964532                                    | 0.768993056                                       | -0.71181451                              |
| 29 | ENSMUSG00000042385 | Gzmk      | granzyme k                    | 4.325152731                                    | 2.573743915                                       | 0.471959973                              |
| 30 | ENSMUSG00000055170 | Ifng      | interferon (IFN) gamma        | 3.745277454                                    | 2.437222094                                       | 0.779473204                              |
| 31 | ENSMUSG00000020053 | Igf1      | insulin-like growth factor    | 2.080126235                                    | 0.343258981                                       | 0.430074617                              |
| 32 | ENSMUSG00000004296 | Il12b     | cytokine receptor             | 2.712396719                                    | 2.088522633                                       | 1.399946456                              |
| 33 | ENSMUSG00000000791 | Il12rb1   | cytokine receptor             | 2.187617754                                    | 1.499843543                                       | 1.04707229                               |
| 34 | ENSMUSG00000025746 | Il6       | cytokine                      | 2.058588761                                    | 0.061158731                                       | -0.604491064                             |
| 35 | ENSMUSG00000028068 | Iqgap3    | TGF-beta regulator            | 3.002263265                                    | 0.506649039                                       | -1.723395856                             |
| 36 | ENSMUSG00000075502 | Kbtbd6    | ubiquitin ligase complex      | 2.23621592                                     | 0.043062089                                       | -0.817739186                             |
| 37 | ENSMUSG00000030167 | Klrc1     | NK cell receptor              | 2.449360231                                    | 1.581455803                                       | -0.472801753                             |
| 38 | ENSMUSG00000052736 | Klrc2     | NK cell receptor              | 2.175533407                                    | 1.423565465                                       | -0.292268426                             |
| 39 | ENSMUSG00000026822 | Lcn2      | lipocalin2                    | 2.112078351                                    | 1.100572741                                       | 0.522130465                              |
| 40 | ENSMUSG00000032496 | Ltf*      | lactoferrin                   | 1.992547271                                    | 4.286560201                                       | 3.100820189                              |
| 41 | ENSMUSG00000025044 | Msr1      | macrophage scavenger receptor | 2.05474814                                     | 0.843271115                                       | 0.017107359                              |
| 42 | ENSMUSG00000066108 | Muc5b*    | mucin                         | 0.628880777                                    | 2.720909442                                       | 1.922841391                              |
| 43 | ENSMUSG00000041616 | Nppa*     | atrial natriuretic peptide    | 2.933443436                                    | 8.865166926                                       | 8.657805717                              |
| 44 | ENSMUSG00000028004 | Npy2r     | neuropeptide receptor         | 2.305706854                                    | 1.630568222                                       | 0.011538217                              |
| 45 | ENSMUSG00000051048 | P4ha3     | prolyl hydroxylase            | 2.254461939                                    | -0.060027081                                      | -0.205467194                             |
| 46 | ENSMUSG00000073530 | Pappa2    | metalloproteinase             | 3.06803496                                     | 0.448971657                                       | 0.607336488                              |
| 47 | ENSMUSG00000026285 | Pdcd1     | programmed cell death         | 3.577369144                                    | 1.862333704                                       | 1.14726533                               |
| 48 | ENSMUSG00000061100 | Retnla    | resistin-like alpha           | 4.404733538                                    | 0.914403916                                       | -0.233039772                             |
| 49 | ENSMUSG00000040026 | Saa3      | serum amyloid a3              | 3.369017515                                    | 2.237460255                                       | 1.522796385                              |
| 50 | ENSMUSG00000025165 | Sectm1a   | amplifies inflammation        | 2.723137151                                    | 1.661536724                                       | -0.999806351                             |
| 51 | ENSMUSG00000053318 | Slamf8    | inflammation                  | 2.366014829                                    | 1.649682688                                       | 1.066977188                              |

|    |                    |         |                             |             |             |              |
|----|--------------------|---------|-----------------------------|-------------|-------------|--------------|
| 52 | ENSMUSG00000069793 | Slfn9   | regulated by IFNs           | 2.720794472 | 0.32095464  | -1.164594027 |
| 53 | ENSMUSG00000029304 | Spp1    | secreted phosphoprotein     | 2.429382988 | 0.346849649 | 0.060155355  |
| 54 | ENSMUSG00000001131 | Timp1   | metallopeptidase inhibitor  | 2.425745666 | 0.393727713 | 0.476193964  |
| 55 | ENSMUSG00000028364 | Tnc     | tenascin c                  | 2.900379529 | 0.176327893 | 0.363043471  |
| 56 | ENSMUSG00000024401 | Tnf     | cytokine                    | 2.082609908 | 1.394383319 | 0.309648235  |
| 57 | ENSMUSG00000028965 | Tnfrsf9 | cytokine receptor           | 2.711512391 | 1.672183417 | 0.509129154  |
| 58 | ENSMUSG00000044162 | Tnip3   | TNF interacting protien     | 2.208192544 | 1.00178983  | 0.434738637  |
| 59 | ENSMUSG00000023992 | Trem2   | myeloid triggering receptor | 2.471953775 | 1.591173988 | 0.838468719  |
| 60 | ENSMUSG00000035186 | Ubd     | ubiquitin d                 | 6.474484797 | 4.270454652 | 1.746076047  |
| 61 | ENSMUSG00000069792 | Wfdc17  | inflammation                | 1.957159491 | 1.439550402 | 0.855167854  |

**Table S2. Differential regulation of mitosis and cell cycle-associated genes.** Ensembl identification, gene name, and log<sub>2</sub> fold change (FC) documenting differential regulation of mitosis and cell cycle associated genes in mouse lung tissue as revealed by RNA sequencing data. See also Figure 3 and GSE186740.

|    | ENSEMBL ID         | Gene name | Gene function                          | Log <sub>2</sub>  FC <br>+pvm vs. con-<br>trol | Log <sub>2</sub>  FC <br>+pvm+Lp vs. con-<br>trol | Log <sub>2</sub>  FC <br>+Lp vs.<br>control |
|----|--------------------|-----------|----------------------------------------|------------------------------------------------|---------------------------------------------------|---------------------------------------------|
| 1  | ENSMUSG00000046295 | Ankle1    | DNA damage and repair                  | 2.757510083                                    | 0.106148628                                       | -2.639285581                                |
| 2  | ENSMUSG00000036777 | Anln      | anillin - cell division                | 2.52704885                                     | 0.186980424                                       | -0.930793506                                |
| 3  | ENSMUSG00000005470 | Asf1b     | histone deposition                     | 2.162153678                                    | 0.141083381                                       | -0.593642329                                |
| 4  | ENSMUSG00000033952 | Aspm      | spindle formation                      | 2.920335427                                    | 0.294031249                                       | -1.328060583                                |
| 5  | ENSMUSG00000078521 | Aunip     | aurora kinase interacting pro-<br>tein | 2.796703029                                    | 0.344671486                                       | -0.571822318                                |
| 6  | ENSMUSG00000027496 | Aurka     | aurora kinase - mitosis                | 2.847871379                                    | 0.465369717                                       | -0.751855272                                |
| 7  | ENSMUSG00000020897 | Aurkb     | aurora kinase - mitosis                | 3.055105167                                    | 0.648737633                                       | -0.635012432                                |
| 8  | ENSMUSG00000017146 | Brca1     | DNA repair                             | 2.169839076                                    | -0.059160807                                      | -1.090042724                                |
| 9  | ENSMUSG00000034329 | Brip1     | Fanconi anemia - downstream<br>of E2F  | 1.955432854                                    | 0.348133987                                       | -0.431634922                                |
| 10 | ENSMUSG00000027379 | Bub1      | mitotic checkpoint kinase              | 2.571407848                                    | 0.386384859                                       | -0.087755297                                |
| 11 | ENSMUSG00000040084 | Bub1b     | mitotic checkpoint                     | 2.501660401                                    | 0.24478917                                        | -0.827119462                                |
| 12 | ENSMUSG00000027793 | Ccna1     | cyclin                                 | 2.48465893                                     | 0.510398823                                       | -0.738259001                                |
| 13 | ENSMUSG00000027715 | Ccna2     | cyclin                                 | 3.060652405                                    | 0.573638296                                       | -0.991949125                                |
| 14 | ENSMUSG00000041431 | Ccnb1     | cyclin                                 | 3.275840682                                    | 0.55853865                                        | -1.169825852                                |
| 15 | ENSMUSG00000002068 | Ccne1     | cyclin                                 | 2.836050329                                    | 0.398453269                                       | -0.31142319                                 |
| 16 | ENSMUSG00000028212 | Ccne2     | cyclin                                 | 2.861709789                                    | 0.673932995                                       | -0.671869614                                |
| 17 | ENSMUSG00000072082 | Ccnf      | cyclin                                 | 2.590387305                                    | 0.816030066                                       | -0.223733396                                |
| 18 | ENSMUSG00000031971 | Cesap     | spndle protein                         | 1.978526958                                    | 1.010224122                                       | 0.673965804                                 |
| 19 | ENSMUSG00000006398 | Cdc20     | cyclin-dependent kinase                | 2.880592957                                    | 0.729078873                                       | -0.357116431                                |
| 20 | ENSMUSG00000044201 | Cdc25c    | cyclin-dependent kinase                | 3.384591326                                    | 0.741893689                                       | -1.045277275                                |
| 21 | ENSMUSG00000017499 | Cdc6      | cyclin-dependent kinase                | 2.534574794                                    | 0.419418986                                       | -0.742613051                                |
| 22 | ENSMUSG00000048922 | Cdca2     | cyclin-dependent kinase                | 2.576494227                                    | 0.248810208                                       | -1.057076299                                |
| 23 | ENSMUSG00000023505 | Cdca3     | cyclin-dependent kinase                | 2.535671915                                    | 0.397674141                                       | -0.967556735                                |
| 24 | ENSMUSG00000024791 | Cdca5     | cyclin-dependent kinase                | 2.633830898                                    | 0.180280727                                       | -0.686069733                                |
| 25 | ENSMUSG00000028873 | Cdca8     | cyclin-dependent kinase                | 2.822368964                                    | 0.321004644                                       | -0.431651712                                |
| 26 | ENSMUSG00000019942 | Cdk1      | cyclin-dependent kinase                | 3.205126209                                    | 0.683856947                                       | -0.947497257                                |
| 27 | ENSMUSG00000037628 | Cdkn3     | cyclin-dependent kinase                | 3.528603519                                    | 0.902368106                                       | -0.569712401                                |
| 28 | ENSMUSG00000045328 | Cenpe     | centromere protein                     | 3.02476082                                     | 0.231846659                                       | -1.320297342                                |
| 29 | ENSMUSG00000026605 | Cenpf     | centromere protein                     | 3.388305324                                    | 0.712618465                                       | -1.305793372                                |
| 30 | ENSMUSG00000045273 | Cenph     | centromere protein                     | 2.086444141                                    | -0.374946176                                      | -1.153895903                                |
| 31 | ENSMUSG00000031262 | Cenpi     | centromere protein                     | 2.876341318                                    | 0.686026848                                       | -0.58446703                                 |
| 32 | ENSMUSG00000021714 | Cenpk     | centromere protein                     | 1.946646818                                    | -0.138202722                                      | -1.171479358                                |
| 33 | ENSMUSG00000068101 | Cenpm     | centromere protein                     | 2.614589743                                    | 0.677291412                                       | -1.042925092                                |
| 34 | ENSMUSG00000031756 | Cenpn     | centromere protein                     | 2.248578299                                    | 0.451916496                                       | -0.270784933                                |
| 35 | ENSMUSG00000021391 | Cenpp     | centromere protein                     | 2.550346623                                    | 0.618903045                                       | -0.246985016                                |
| 36 | ENSMUSG00000024989 | Cep55     | mitotic phosphoprotein                 | 3.146810177                                    | 0.649109846                                       | -1.068641995                                |
| 37 | ENSMUSG00000032113 | Chk1      | checkpoint kinase                      | 2.085059637                                    | -0.070529518                                      | -0.327816024                                |
| 38 | ENSMUSG00000037725 | Ckap2     | cytoskeletal protein - mitosis         | 3.134122142                                    | 0.480724647                                       | -1.188122051                                |
| 39 | ENSMUSG00000048327 | Ckap2l    | cytoskeletal protein - mitosis         | 2.710566128                                    | 0.230010949                                       | -1.188122051                                |
| 40 | ENSMUSG00000028044 | Cks1b     | cell cycle control                     | 1.975599735                                    | 0.206879118                                       | -0.102873365                                |
| 41 | ENSMUSG00000062248 | Cks2      | cell cycle control                     | 2.071850054                                    | 0.253761975                                       | -0.489113198                                |
| 42 | ENSMUSG00000042489 | Clspn     | cell cycle arrest                      | 3.114828121                                    | 0.688427052                                       | -0.891862857                                |
| 43 | ENSMUSG00000022021 | Diaph3    | spindle assembly checkpoint            | 2.514719659                                    | 0.212876944                                       | -0.645942976                                |
| 44 | ENSMUSG00000037544 | Dlgap5    | kinetochore protein                    | 3.126798967                                    | 0.650951928                                       | -0.893040527                                |
| 45 | ENSMUSG00000020185 | E2f7      | transcription factor cell cycle        | 2.602169863                                    | 0.635870884                                       | 0.069719                                    |
| 46 | ENSMUSG00000046179 | E2f8      | transcription factor - cell cycle      | 2.629866016                                    | 0.548385886                                       | -0.751925914                                |
| 47 | ENSMUSG00000027699 | Ect2      | regulates cytokinesis                  | 2.447733309                                    | 0.378791511                                       | -0.821911937                                |
| 48 | ENSMUSG00000087060 | Eldr      | lnc RNA downstream EGFR                | 1.957572061                                    | 0.41392802                                        | -1.697800653                                |
| 49 | ENSMUSG00000039055 | Eme1      | DNA endonuclease                       | 2.977775757                                    | 0.867071756                                       | -1.390067713                                |

|     |                    |          |                                          |             |             |              |
|-----|--------------------|----------|------------------------------------------|-------------|-------------|--------------|
| 50  | ENSMUSG00000051220 | Ercc6l   | spindle assembly checkpoint              | 2.155913664 | 0.436415184 | -0.219630494 |
| 51  | ENSMUSG00000029377 | Ereg     | epiregulin EGF like                      | 3.03453152  | 0.083515183 | -0.365641648 |
| 52  | ENSMUSG00000022034 | Esco2    | chromosome separation                    | 3.106603865 | 0.825249889 | -1.067075061 |
| 53  | ENSMUSG00000058290 | Espl1    | chromosome segregation                   | 2.413772535 | 0.541365042 | -0.531095697 |
| 54  | ENSMUSG00000039748 | Exo1     | 5' to 3' exonuclease activity            | 2.434732651 | 0.245479264 | -0.810765274 |
| 55  | ENSMUSG00000051225 | Fam83a   | cell proliferaton                        | 2.468887614 | 1.165891941 | 0.651248392  |
| 56  | ENSMUSG00000027654 | Fam83d   | mitosis                                  | 2.713410877 | 0.293209721 | -0.929087709 |
| 57  | ENSMUSG00000039187 | Fanci    | DNA repair                               | 2.268441162 | 0.205420223 | -0.700629764 |
| 58  | ENSMUSG00000035455 | Figl1    | repairs double strand breaks             | 2.384266397 | 0.102372286 | -0.682535278 |
| 59  | ENSMUSG00000001517 | Foxm1    | regulates expression of cell cycle genes | 2.180005095 | 0.213079555 | -0.4328892   |
| 60  | ENSMUSG00000074802 | Gas2l3   | growth arrest                            | 2.431549133 | 0.483124982 | -0.157217464 |
| 61  | ENSMUSG00000031821 | Gins2    | DNA replication                          | 2.097604317 | 0.103601599 | -0.711678093 |
| 62  | ENSMUSG00000022385 | Gtse1    | G2 and S phase protein                   | 2.803255917 | 0.678488253 | -0.385066509 |
| 63  | ENSMUSG00000022367 | Has2     | hyaluron synthase                        | 2.894229624 | 0.336642498 | -0.196427701 |
| 64  | ENSMUSG00000025001 | Hells    | helicase                                 | 2.026851826 | 0.10557186  | -0.600889806 |
| 65  | ENSMUSG00000020330 | Hmmr     | HA receptor and mitosis                  | 3.041728006 | 0.283618703 | -1.576319526 |
| 66  | ENSMUSG00000012443 | Kif11    | kinesin family                           | 2.824664361 | 0.446713678 | -0.90989579  |
| 67  | ENSMUSG00000041498 | Kif14    | kinesin family                           | 2.292384573 | 0.273139206 | -0.703645925 |
| 68  | ENSMUSG00000036768 | Kif15    | kinesin family                           | 2.672553799 | 0.576895516 | -0.662771597 |
| 69  | ENSMUSG00000051378 | Kif18b   | kinesin family                           | 3.187181503 | 0.706300568 | -1.146079381 |
| 70  | ENSMUSG00000003779 | Kif20a   | kinesin family                           | 2.819736487 | 0.227450174 | -1.167966802 |
| 71  | ENSMUSG00000024795 | Kif20b   | kinesin family                           | 2.108691711 | 0.063169649 | -1.051776675 |
| 72  | ENSMUSG00000030677 | Kif22    | kinesin family                           | 2.934099344 | 0.757782701 | -0.917039529 |
| 73  | ENSMUSG00000032254 | Kif23    | kinesin family                           | 2.260316906 | 0.326146915 | -0.789075052 |
| 74  | ENSMUSG00000028678 | Kif2c    | kinesin family                           | 3.151962346 | 0.570142619 | -0.888351483 |
| 75  | ENSMUSG00000079553 | Kifc1    | kinesin family                           | 2.580459433 | 0.430069419 | -0.630344886 |
| 76  | ENSMUSG00000024301 | Kifc5b   | kinesin family                           | 2.019801795 | 0.086366839 | -0.518882772 |
| 77  | ENSMUSG00000027326 | Kn1l     | kinetochore scaffold 1                   | 2.845486908 | 0.487841667 | -1.546258242 |
| 78  | ENSMUSG00000027331 | Knstrn   | kinetochore                              | 2.836844842 | 0.371729329 | -0.856192921 |
| 79  | ENSMUSG00000029414 | Kntc1    | kinetochore protein                      | 2.78577922  | 0.074405901 | -1.115445691 |
| 80  | ENSMUSG00000098318 | Lockd    | downstream RNA of Cdk                    | 2.245399506 | 0.212637613 | -0.945396706 |
| 81  | ENSMUSG00000026779 | Mastl    | microtubule interactions mitosis         | 2.514107275 | 0.080302543 | -1.236819443 |
| 82  | ENSMUSG00000074651 | Meidas   | dna synthesis and cell cycle             | 1.976806041 | 0.050593499 | -1.47113712  |
| 83  | ENSMUSG00000026669 | Mcm10    | promotes strand annealing                | 2.330460064 | 0.231057661 | -0.663640846 |
| 84  | ENSMUSG00000026355 | Mcm6     | DNA replication                          | 2.110757038 | 0.35464977  | -0.328853251 |
| 85  | ENSMUSG00000035683 | Melk     | cell cycle control                       | 2.84139706  | 0.475737372 | -0.841889274 |
| 86  | ENSMUSG00000047534 | Mis18bp1 | chromosomal segregation during mitosis   | 2.865393838 | 0.133439485 | -0.563395922 |
| 87  | ENSMUSG00000031004 | Mki67    | proliferation marker                     | 2.995540526 | 0.346242644 | -1.229630586 |
| 88  | ENSMUSG00000019992 | Mtfr2    | mitochondrial fission regulator          | 2.346352177 | 0.195071074 | -1.215180667 |
| 89  | ENSMUSG00000021485 | Mxd3     | DNA binding protein                      | 3.082165235 | 0.687645352 | -0.292099135 |
| 90  | ENSMUSG00000015880 | Ncapg    | chromosome condensation                  | 2.934998296 | 0.677929518 | -1.146939675 |
| 91  | ENSMUSG00000024056 | Ndc80    | component of kinetochore complex         | 2.97232721  | 0.636884651 | -0.595314314 |
| 92  | ENSMUSG00000039396 | Neil3    | DNA replication and repair               | 3.052163742 | 0.486574039 | -1.457579771 |
| 93  | ENSMUSG00000026683 | Nuf2     | kinetochore complex                      | 2.894054952 | 0.244748368 | -1.694015379 |
| 94  | ENSMUSG00000027306 | Nusap1   | nucleolar and spindle protein            | 2.550657089 | 0.322921419 | -1.051151908 |
| 95  | ENSMUSG00000028587 | Orc1     | DNA replication prior to mitosis         | 2.678345528 | 0.242408124 | 0.162394874  |
| 96  | ENSMUSG00000022033 | Pbk      | kinase activated by mitosis              | 2.902710963 | 0.560217543 | -1.685408166 |
| 97  | ENSMUSG00000040204 | Pclaf    | promotes anaphase - mitotic regulator    | 3.360620149 | 1.05829635  | -0.396248083 |
| 98  | ENSMUSG00000041064 | Pif1     | DNA helicase                             | 3.346777348 | 0.514829178 | -1.476663112 |
| 99  | ENSMUSG00000020808 | Pimreg   | mitotic regulator                        | 3.487922075 | 1.085502834 | -1.435801181 |
| 100 | ENSMUSG00000030867 | Plk1     | polo kinase                              | 2.740184663 | 0.255740316 | -0.545487357 |
| 101 | ENSMUSG00000007080 | Pole     | DNA polymerase                           | 2.267780754 | 0.27812282  | -0.699255213 |
| 102 | ENSMUSG00000038943 | Prc1     | regulator of cytokinesis                 | 3.001048279 | 0.49801609  | -1.260579349 |

|     |                    |        |                                             |             |              |              |
|-----|--------------------|--------|---------------------------------------------|-------------|--------------|--------------|
| 103 | ENSMUSG00000020493 | Prr11  | cell cycle                                  | 2.618163941 | 0.355542326  | -0.859035889 |
| 104 | ENSMUSG00000068744 | Psrc1  | mitosis                                     | 2.514150422 | 0.835904119  | -0.381449151 |
| 105 | ENSMUSG00000020415 | Pttg1  | sister chromatid separation                 | 2.032744663 | 0.384606401  | -0.300894042 |
| 106 | ENSMUSG00000027323 | Rad51  | DNA repair double strand breaks             | 2.61020718  | 0.441686873  | -0.766656277 |
| 107 | ENSMUSG00000078773 | Rad54b | DNA repair and recombination                | 2.373256248 | 0.558754018  | -0.721271698 |
| 108 | ENSMUSG00000028702 | Rad54l | DNA repair and recombination                | 2.284357478 | 0.12652587   | -0.113937487 |
| 109 | ENSMUSG00000037991 | Rmi2   | homologous recomb DNA re-pair               | 2.367534828 | 0.939216344  | 0.09833412   |
| 110 | ENSMUSG00000020649 | Rrm2   | ribonucleotide reductase - cell cycle       | 2.822460445 | 0.698514857  | -0.816808616 |
| 111 | ENSMUSG00000026955 | Sapcd2 | mitosis spindle orientation                 | 2.877049852 | 1.10976583   | -0.991685273 |
| 112 | ENSMUSG00000023940 | Sgo1   | shugoshin complexes with centrom            | 2.852551117 | 0.131883586  | -1.039480114 |
| 113 | ENSMUSG00000026039 | Sgo2a  | shugoshin2a - complexes with centrom        | 2.500346219 | 0.298139451  | -1.071396042 |
| 114 | ENSMUSG00000036223 | Ska1   | spindle and kinetochore                     | 2.793963988 | 0.614318219  | -0.583397651 |
| 115 | ENSMUSG00000021965 | Ska3   | spindle and kinetochore                     | 3.277200733 | 1.058113875  | -0.592262959 |
| 116 | ENSMUSG00000002055 | Spag5  | mitotic spindle protein                     | 2.961294683 | 0.57574938   | -1.091077244 |
| 117 | ENSMUSG00000074476 | Spc24  | kinetochore protein                         | 2.27354983  | 0.326521994  | -0.858659128 |
| 118 | ENSMUSG00000005233 | Spc25  | kinetochore component                       | 2.658101471 | 0.373034126  | -1.171839185 |
| 119 | ENSMUSG00000069910 | Spdl1  | mitotic checkpoint                          | 2.433463435 | 0.274126862  | -0.504599557 |
| 120 | ENSMUSG00000028718 | Stil   | centriolar assembly                         | 3.023519146 | 0.555106352  | -1.221371642 |
| 121 | ENSMUSG00000037313 | Tacc3  | kinetochore stabilization                   | 2.180987998 | 0.362589055  | -0.728907378 |
| 122 | ENSMUSG00000046591 | Ticrr  | checkpoint regulator cell cycle progression | 3.850003753 | 1.601724134  | -0.129732876 |
| 123 | ENSMUSG00000020914 | Top2a  | DNA topoisomerase                           | 3.02170854  | 0.504335111  | -1.051211495 |
| 124 | ENSMUSG00000027469 | Tpx2   | interacts with aurora kinases               | 3.051288509 | 0.557361584  | -0.571184581 |
| 125 | ENSMUSG00000021569 | Trip13 | spindle assembly                            | 2.546215095 | 0.886240801  | -0.114299175 |
| 126 | ENSMUSG00000038379 | Ttk    | kinase alignment at centromere              | 2.896606324 | 0.336296986  | -1.470761585 |
| 127 | ENSMUSG00000001403 | Ube2c  | cell cycle regulator                        | 3.028672921 | 0.608055992  | -0.593410706 |
| 128 | ENSMUSG00000026429 | Ube2t  | ubiquitin conjugating enzyme                | 2.059757554 | 0.047246791  | -0.009567983 |
| 129 | ENSMUSG00000001228 | Uhrf1  | ubiquitin ligase                            | 2.637970625 | 0.451316623  | -0.63915275  |
| 130 | ENSMUSG00000021614 | Vcan   | versican cell cycling                       | 2.68672228  | 0.441900721  | -0.206780498 |
| 131 | ENSMUSG00000032400 | Zwilch | kinetochore protein                         | 1.961345463 | -0.081855897 | -0.826550872 |
